# Supplementary material for: Remodeling of O Antigen in Mucoid Pseudomonas aeruginosa via Transcriptional Repression of wzz2
Source: PubMed Central journal article supplement (PMC6381286; doi:10.1128/mbio.02914-18), 2019-02-19
Supplement: mBio.02914-18-s0002.pdf [file mBio.02914-18-s0002.pdf]

## SUPPLEMENTAL REFERENCES

1. **Held K, Ramage E, Jacobs M, Gallagher L, Manoil C.** 2012. Sequence-verified two-allele transposon mutant library for *Pseudomonas aeruginosa* PAO1. *J Bacteriol* **194**:6387-6389.
2. **Jacobs MA, Alwood A, Thaipisuttikul I, Spencer D, Haugen E, Ernst S, Will O, Kaul R, Raymond C, Levy R, Chun-Rong L, Guenther D, Bovee D, Olson MV, Manoil C.** 2003. Comprehensive transposon mutant library of *Pseudomonas aeruginosa*. *Proc Natl Acad Sci U S A* **100**:14339-14344.
3. **Simon R, Priefer U, Puhler A.** 1983. A Broad Host Range Mobilization System for in vivo Genetic Engineering: Transposon Mutagenesis in Gram Negative Bacteria. *Biotechnology*:784-791.
4. **Hancock REW, Carey AM.** 1979. Outer Membrane of *Pseudomonas aeruginosa*: Heat- and 2- Mercaptoethanol-Modifiable Proteins. *J Bacteriol* **140**:902-910.
5. **Mathee K, Ciofu O, Sternbrg C, Lindum PW, Campbell JIA, Jensen P, Johnsten AH, Givskov M, Ohman DE, Molin S, Hoiby N, Kharazmi A.** 1999. Mucoid conversion of *Pseudomonas aeruginosa* by hydrogen peroxide: a mechanism for virulence activation in the cystic fibrosis lung. *Microbiology* **145**:1349-1357.
6. **Rahme LG, Stevens EJ, Wolfort SF, Jing Shao J, Tompkins RG, Ausubel FM.** 1995. Common Virulence Factors for Bacterial Pathogenicity in Plants and Animals. *Science* **268**:1899-1902.
7. **Limoli DH, Whitfield GB, Kitao T, Ivey ML, Davis Jr. MR, Grahl N, Hogan DA, Rahme LG, Howell PL, O'Toole GA, J.B G.** 2017. *Pseudomonas aeruginosa* Alginate Overproduction Promotes Coexistence with *Staphylococcus aureus* in a Model of Cystic Fibrosis Respiratory Infection. *mBio* **8**.
8. **Ohman DE, Chakrabarty AM.** 1981. Genetic Mapping of Chromosomal Determinants for the Production of the Exopolysaccharide Alginate in a *Pseudomonas aeruginosa* Cystic Fibrosis Isolate. *Infect Immun* **33**:142-148.
9. **Ramsey DM, Baynham PJ, Wozniak DJ.** 2005. Binding of *Pseudomonas aeruginosa* AlgZ to sites upstream of the algZ promoter leads to repression of transcription. *J Bacteriol* **187**:4430-4443.
10. **Hoang TT, Kutchma AJ, Becher A, Schweizer HP.** 2000. Integration-proficient plasmids for *Pseudomonas aeruginosa*: site-specific integration and use for engineering of reporter and expression strains. *Plasmid* **43**:59-72.
11. **Becher A, Schweizer H.** 2000. Integration-Proficient *Pseudomonas aeruginosa* Vectors for Isolation of Single-Copy Chromosomal lacZ and lux Gene Fusions. *BioTechniques* **29**.

12. **Rietsch A, Vallet-Gely I, Dove SL, Mekalanos JJ.** 2005. ExsE, a secreted regulator of type III secretion genes in *Pseudomonas aeruginosa*. *Proc Natl Acad Sci U S A* **102**:8006-8011.
13. **Meisner J, Goldberg JB.** 2016. The *Escherichia coli* rhaSR-PrhaBAD Inducible Promoter System Allows Tightly Controlled Gene Expression over a Wide Range in *Pseudomonas aeruginosa*. *Appl Environ Microbiol* **82**:6715-6727.
14. **Choi KH, Schweizer HP.** 2006. mini-Tn7 insertion in bacteria with single attTn7 sites: example *Pseudomonas aeruginosa*. *Nat Protoc* **1**:153-161.
15. **Qiu D, Damron FH, Mima T, Schweizer HP, Yu HD.** 2008. PBAD-based shuttle vectors for functional analysis of toxic and highly regulated genes in *Pseudomonas* and *Burkholderia* spp. and other bacteria. *Appl Environ Microbiol* **74**:7422-7426.
16. **Choi KH, Mima T, Casart Y, Rhol D, Kumar A, Beacham IR, Schweizer HP.** 2008. Genetic tools for select-agent-compliant manipulation of *Burkholderia pseudomallei*. *Appl Environ Microbiol* **74**:1064-1075.
17. **Savli H, Karadenizli A, Kolayli F, Gundes S, Ozbek U, Vahaboglu H.** 2003. Expression stability of six housekeeping genes: a proposal for resistance gene quantification studies of *Pseudomonas aeruginosa* by real-time quantitative RT-PCR. *Journal of Medical Microbiology* **52**:403-408.
18. **Choi KH, Kumar A, Schweizer HP.** 2006. A 10-min method for preparation of highly electrocompetent *Pseudomonas aeruginosa* cells: application for DNA fragment transfer between chromosomes and plasmid transformation. *J Microbiol Methods* **64**:391-397.
