# Supplementary material for: Remodeling of O Antigen in Mucoid Pseudomonas aeruginosa via Transcriptional Repression of wzz2
Source: PubMed Central journal article supplement (PMC6381286; doi:10.1128/mbio.02914-18), 2019-02-19
Supplement: mBio.02914-18-sf001.pdf [file mBio.02914-18-sf001.pdf]

**SUPPLEMENTAL MATERIAL**

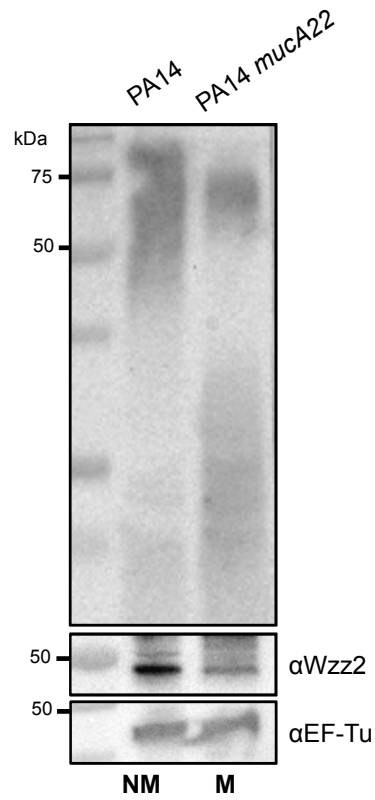

**Figure S1. Muroid PA14 has reduced levels of Wzz2 and fewer very long O antigen chain-lengths compared to nonmuroid PA14.** Analysis of Wzz2 and serotype O10 antigen production. Samples were prepared and western blot was performed as described in Figure 1. Key: NM, nonmuroid; M, muroid.
