# Supplementary material for: Remodeling of O Antigen in Mucoid Pseudomonas aeruginosa via Transcriptional Repression of wzz2
Source: PubMed Central journal article supplement (PMC6381286; doi:10.1128/mbio.02914-18), 2019-02-19
Supplement: mBio.02914-18-sf002.pdf [file mBio.02914-18-sf002.pdf]

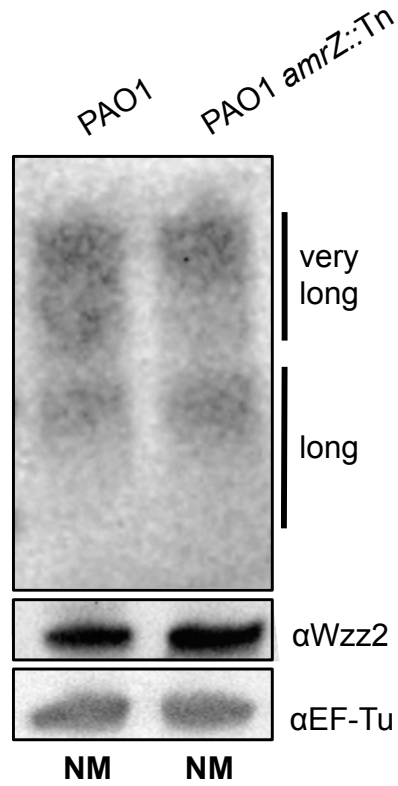

**Figure S2. Disruption of *amrZ* in PAO1 does not alter Wzz2 or O antigen production.** Wzz2 and serotype O5 antigen were monitored in each strain. PAO1 *amrZ::Tn* is a transposon mutant from the PAO1 library (1, 2). Samples were prepared and western blot was performed as described in Figure 1. Key: NM, nonmucoid; M, mucoid.
