# Supplementary material for: Remodeling of O Antigen in Mucoid Pseudomonas aeruginosa via Transcriptional Repression of wzz2
Source: PubMed Central journal article supplement (PMC6381286; doi:10.1128/mbio.02914-18), 2019-02-19
Supplement: mBio.02914-18-st002.pdf [file mBio.02914-18-st002.pdf]

**Table S2. Strains and plasmids used in this study.**

| Bacterial Strain or Plasmid            | Description                                                       | Reference  |
|----------------------------------------|-------------------------------------------------------------------|------------|
| <i>E. coli</i>                         |                                                                   |            |
| DH5 $\alpha$                           | plasmid maintenance                                               | Invitrogen |
| BL21(DE3)                              | protein expression and purification                               | Invitrogen |
| SM10                                   | bi-parental mating                                                | 3          |
| <i>P. aeruginosa</i>                   |                                                                   |            |
| PAO1                                   | nonmucoid laboratory strain, serotype O5                          | 4          |
| PAO1 <i>wzz2</i> ::Tn                  | PAO1 transposon mutant PW2707                                     | 1,2        |
| PAO1 <i>amrZ</i> ::Tn                  | PAO1 transposon mutant PW6710                                     | 1,2        |
| PDO300                                 | mucoid PAO1 containing <i>mucA22</i> allele                       | 5          |
| PDO300nmr1                             | nonmucoid revertant of PDO300, <i>algT</i> 127-135 duplication    | This study |
| PAO1 <i>mucA22 amrZ</i> ::Tn           | PAO1 transposon mutant PW6710 with <i>mucA22</i> allele           | This study |
| PA14                                   | nonmucoid laboratory strain, serotype O10                         | 6          |
| PA14 <i>mucA22</i>                     | mucoid PA14 containing <i>mucA22</i> allele                       | This study |
| <i>Clinical P. aeruginosa isolates</i> |                                                                   |            |
| CFBRPA10                               | cystic fibrosis nonmucoid clinical isolate                        | This study |
| CFBRPA34                               | cystic fibrosis nonmucoid clinical isolate                        | This study |
| CFBRPA44                               | cystic fibrosis nonmucoid clinical isolate                        | This study |
| CFBRPA20                               | cystic fibrosis nonmucoid clinical isolate                        | This study |
| CFBRPA08                               | cystic fibrosis nonmucoid clinical isolate                        | This study |
| CFBRPA11                               | cystic fibrosis mucoid clinical isolate                           | This study |
| CFBRPA33                               | cystic fibrosis mucoid clinical isolate                           | This study |
| CFBRPA32                               | cystic fibrosis mucoid clinical isolate                           | This study |
| CFBRPA32nmr1                           | nonmucoid revertant of CFBRPA32, <i>algT</i> 127-135 duplication  | This study |
| CFBRPA32nmr2                           | nonmucoid revertant of CFBRPA32, <i>algT</i> 127-135 duplication  | This study |
| CFBRPA43                               | cystic fibrosis mucoid clinical isolate                           | 7          |
| CFBRPA43nmr1                           | nonmucoid revertant of CFBRPA43, mutations not in <i>algT</i>     | This study |
| CFBRPA43nmr2                           | nonmucoid revertant of CFBRPA43, <i>algTC</i> 245A transversion   | This study |
| FRD1                                   | mucoid clinical CF isolate                                        | 8          |
| FRD1 $\Delta amrZ$                     | FRD1 with <i>amrZ</i> deleted                                     | 9          |
| <i>Plasmids</i>                        |                                                                   |            |
| miniCTX1                               | attCTX integration proficient                                     | 10         |
| miniCTX1- <i>lacZ</i>                  | miniCTX1 containing promoterless- <i>lacZ</i> reporter            | 11         |
| miniCTX1-optRBS- <i>lacZ</i>           | miniCTX1 promoterless- <i>lacZ</i> reporter with optimized RBS    | This study |
| miniCTX1-Pwzz2-optRBS- <i>lacZ</i>     | contains -25 to -500 bp of <i>wzz2</i> promoter                   | This study |
| pEXG2                                  | allelic exchange vector                                           | 12         |
| pEXG2- <i>mucA22</i>                   | contains <i>mucA22</i> allele amplified from PDO300               | This study |
| miniTn7T-Gm-lacIq-Ptac                 | attTn7 integration proficient, IPTG inducible                     | 13         |
| miniTn7T-Gm-lacIq-Ptac- <i>algT</i>    | contains coding region of <i>algT</i> for overexpression          | This study |
| miniTn7T-Gm-lacIq-Ptac- <i>amrZ</i>    | contains coding region of <i>amrZ</i> for overexpression          | This study |
| pET28a                                 | protein expression vector                                         | Addgene    |
| pET28a-his6-wzz2deltaTMS               | expression vector containing His-tagged <i>wzz2</i> (without TMS) | This study |
| pHERD20T                               | multicopy overexpression plasmid, arabinose inducible             | 15         |
| pHERD20T- <i>wzz2</i>                  | contains <i>wzz2</i> coding sequence for multicopy expression     | This study |
| pHERD20T- <i>algT</i>                  | contains <i>algT</i> coding sequence for multicopy expression     | 15         |
| pTNS3                                  | transposase helper                                                | 16         |
