# Supplementary material for: Remodeling of O Antigen in Mucoid Pseudomonas aeruginosa via Transcriptional Repression of wzz2
Source: PubMed Central journal article supplement (PMC6381286; doi:10.1128/mbio.02914-18), 2019-02-19
Supplement: mBio.02914-18-st003.pdf [file mBio.02914-18-st003.pdf]

**Table S1. Alginate produced by strains overexpressing *algT***

| <b>Strain</b>                          | <b>Inducer<br/>(1mM IPTG)</b> | <b>Alginate<br/>(<math>\mu\text{g/ml}</math>)</b> | <b>SD<sup>a</sup></b> | <b>Fold<br/>Change</b> |
|----------------------------------------|-------------------------------|---------------------------------------------------|-----------------------|------------------------|
| PDO300nmr1 <i>P<sub>tac</sub>-algT</i> | -                             | 29.48                                             | 19.02                 | 0.90                   |
|                                        | +                             | 26.52                                             | 21.40                 |                        |
| PAO1 <i>P<sub>tac</sub>-algT</i>       | -                             | 6.80                                              | 5.12                  | 161.85                 |
|                                        | +                             | 1101.15                                           | 76.90                 |                        |

<sup>a</sup>Standard Deviation
